# Supplementary material
Source: PubMed Central journal article supplement (PMC9373955)
Supplement: glab362_suppl_supplementary_materials.pdf [file glab362_suppl_supplementary_materials.pdf]

## **Supplementary materials**

Table S1. The association of *FOXO3A* SNPs, residence and mortality after adjusting for PM2.5 and NDVI

Table S2. The association of *FOXO3A* SNPs, residence and mortality in the female

Table S3. The association of *FOXO3A* SNPs, residence and mortality in the male

Table S4. The association of *FOXO3A* SNPs, residence and mortality in the population aged younger than 85

Table S5. The association of *FOXO3A* SNPs, residence and mortality in the population aged 85 or older

**Table S1. The association of *FOXO3A* SNPs, residence and mortality after adjusting for PM2.5 and NDVI**

| Term                            | Model: NDVI and PM2.5 |         | Model: FOXO+NDVI and PM2.5 |         | Model: Residence+NDVI and PM2.5 |         | Model: FOXO+Residence+NDVI and PM2.5 |         | Model: FOXO*Residence+NDVI and PM2.5 |                  |         |
|---------------------------------|-----------------------|---------|----------------------------|---------|---------------------------------|---------|--------------------------------------|---------|--------------------------------------|------------------|---------|
|                                 | HR (95% CI)           | p value | HR (95% CI)                | p value | HR (95% CI)                     | p value | HR (95% CI)                          | p value | HR (95% CI)                          | beta (std.error) | p.value |
| FOXO3A_936 (CC as reference)    |                       |         |                            |         |                                 |         |                                      |         |                                      |                  |         |
| TC                              |                       |         | 0.979 (0.878, 1.092)       | 0.709   |                                 |         | 0.968 (0.868, 1.08)                  | 0.560   | 0.949 (0.834, 1.079)                 | -0.052 (0.066)   | 0.424   |
| TT                              |                       |         | 0.846 (0.685, 1.045)       | 0.122   |                                 |         | 0.843 (0.682, 1.041)                 | 0.113   | 0.708 (0.541, 0.925)                 | -0.346 (0.137)   | 0.011   |
| Residence (Rural as reference)  |                       |         |                            |         | 0.733 (0.648, 0.829)            | <0.001  | 0.732 (0.648, 0.828)                 | <0.001  | 0.688 (0.586, 0.808)                 | -0.374 (0.082)   | <0.001  |
| FOXO3A_936 TC * Residence-Urban |                       |         |                            |         |                                 |         |                                      |         | 1.067 (0.838, 1.36)                  | 0.065 (0.124)    | 0.597   |
| FOXO3A_936 TT * Residence-Urban |                       |         |                            |         |                                 |         |                                      |         | 1.695 (1.096, 2.622)                 | 0.528 (0.222)    | 0.018   |
| NDVI                            | 0.885 (0.861, 0.909)  | <0.001  | 0.885 (0.862, 0.91)        | <0.001  | 0.868 (0.844, 0.893)            | <0.001  | 0.869 (0.845, 0.894)                 | <0.001  | 0.87 (0.846, 0.895)                  | -0.139 (0.014)   | <0.001  |
| PM 2.5                          | 1.13 (1.086, 1.175)   | <0.001  | 1.128 (1.085, 1.174)       | <0.001  | 1.132 (1.088, 1.177)            | <0.001  | 1.13 (1.086, 1.176)                  | <0.001  | 1.129 (1.085, 1.175)                 | 0.121 (0.02)     | <0.001  |
| FOXO3A_292 (TT as reference)    |                       |         |                            |         |                                 |         |                                      |         |                                      |                  |         |
| TG                              |                       |         | 0.985 (0.883, 1.099)       | 0.787   |                                 |         | 0.976 (0.875, 1.089)                 | 0.664   | 0.969 (0.852, 1.102)                 | -0.032 (0.066)   | 0.627   |
| GG                              |                       |         | 0.833 (0.687, 1.01)        | 0.063   |                                 |         | 0.825 (0.681, 1.001)                 | 0.051   | 0.67 (0.525, 0.856)                  | -0.4 (0.125)     | 0.001   |
| Residence (Rural as reference)  |                       |         |                            |         | 0.733 (0.648, 0.829)            | <0.001  | 0.732 (0.647, 0.827)                 | <0.001  | 0.684 (0.579, 0.808)                 | -0.38 (0.085)    | <0.001  |
| FOXO3A_292 TG * Residence-Urban |                       |         |                            |         |                                 |         |                                      |         | 1.021 (0.801, 1.302)                 | 0.021 (0.124)    | 0.867   |
| FOXO3A_292 GG * Residence-Urban |                       |         |                            |         |                                 |         |                                      |         | 1.897 (1.273, 2.825)                 | 0.64 (0.203)     | 0.002   |
| NDVI                            | 0.885 (0.861, 0.909)  | <0.001  | 0.885 (0.862, 0.91)        | <0.001  | 0.868 (0.844, 0.893)            | <0.001  | 0.869 (0.845, 0.894)                 | <0.001  | 0.87 (0.846, 0.895)                  | -0.139 (0.014)   | <0.001  |
| PM 2.5                          | 1.13 (1.086, 1.175)   | <0.001  | 1.129 (1.086, 1.174)       | <0.001  | 1.132 (1.088, 1.177)            | <0.001  | 1.131 (1.087, 1.177)                 | <0.001  | 1.13 (1.086, 1.176)                  | 0.122 (0.02)     | <0.001  |

| Term                            | Model: NDVI and PM2.5 |         | Model: FOXO+NDVI and PM2.5 |         | Model: Residence+NDVI and PM2.5 |         | Model: FOXO+Residence+NDVI and PM2.5 |         | Model: FOXO*Residence+NDVI and PM2.5 |                  |         |
|---------------------------------|-----------------------|---------|----------------------------|---------|---------------------------------|---------|--------------------------------------|---------|--------------------------------------|------------------|---------|
|                                 | HR (95% CI)           | p value | HR (95% CI)                | p value | HR (95% CI)                     | p value | HR (95% CI)                          | p value | HR (95% CI)                          | beta (std.error) | p.value |
| FOXO3A_310 (GG as reference)    |                       |         |                            |         |                                 |         |                                      |         |                                      |                  |         |
| GC                              |                       |         | 0.969 (0.868, 1.081)       | 0.568   |                                 |         | 0.96 (0.86, 1.071)                   | 0.461   | 0.951 (0.836, 1.082)                 | -0.05 (0.066)    | 0.45    |
| CC                              |                       |         | 0.827 (0.683, 1.002)       | 0.052   |                                 |         | 0.819 (0.676, 0.992)                 | 0.041   | 0.666 (0.522, 0.849)                 | -0.407 (0.124)   | 0.001   |
| Residence (Rural as reference)  |                       |         |                            |         | 0.733 (0.648, 0.829)            | <0.001  | 0.731 (0.646, 0.827)                 | <0.001  | 0.682 (0.578, 0.805)                 | -0.382 (0.085)   | <0.001  |
| FOXO3A_310 GC * Residence-Urban |                       |         |                            |         |                                 |         |                                      |         | 1.024 (0.803, 1.307)                 | 0.024 (0.124)    | 0.848   |
| FOXO3A_310 CC * Residence-Urban |                       |         |                            |         |                                 |         |                                      |         | 1.897 (1.276, 2.822)                 | 0.64 (0.203)     | 0.002   |
| NDVI                            | 0.885 (0.861, 0.909)  | <0.001  | 0.885 (0.862, 0.91)        | <0.001  | 0.868 (0.844, 0.893)            | <0.001  | 0.869 (0.845, 0.894)                 | <0.001  | 0.87 (0.846, 0.895)                  | -0.139 (0.014)   | <0.001  |
| PM 2.5                          | 1.13 (1.086, 1.175)   | <0.001  | 1.129 (1.085, 1.174)       | <0.001  | 1.132 (1.088, 1.177)            | <0.001  | 1.131 (1.087, 1.176)                 | <0.001  | 1.13 (1.086, 1.176)                  | 0.122 (0.02)     | <0.001  |

Note: All models adjusted for baseline age, sex, education, marriage, smoking, alcohol drinking, and exercise

**Table S2. The association of *FOXO3A* SNPs, residence and mortality in the female**

| Term                            | n   | Model - Residence   |         | Model - FOXO         |         | Model - FOXO +residence |         | Model - FOXO*residence |                  |         |
|---------------------------------|-----|---------------------|---------|----------------------|---------|-------------------------|---------|------------------------|------------------|---------|
|                                 |     | HR (95% CI)         | P value | HR (95% CI)          | P value | HR (95% CI)             | P value | HR (95% CI)            | beta (std.error) | p.value |
| FOXO3A_936 (CC as reference)    | 902 |                     |         |                      |         |                         |         |                        |                  |         |
| TC                              | 618 |                     |         | 0.874 (0.755, 1.011) | 0.070   | 0.863 (0.745, 1)        | 0.049   | 0.851 (0.719, 1.009)   | -0.161(0.086)    | 0.063   |
| TT                              | 114 |                     |         | 0.716 (0.532, 0.962) | 0.027   | 0.71 (0.528, 0.955)     | 0.024   | 0.52 (0.351, 0.772)    | -0.653(0.201)    | 0.001   |
| Residence (Rural as reference)  |     | 0.866 (0.74, 1.013) | 0.073   |                      |         | 0.854 (0.73, 1)         | 0.05    | 0.795 (0.648, 0.975)   | -0.23(0.104)     | 0.028   |
| FOXO3A_936 TC * Residence-Urban |     |                     |         |                      |         |                         |         | 1.037 (0.742, 1.449)   | 0.036(0.171)     | 0.833   |
| FOXO3A_936 TT * Residence-Urban |     |                     |         |                      |         |                         |         | 2.427 (1.332, 4.423)   | 0.887(0.306)     | 0.004   |
| <hr/>                           |     |                     |         |                      |         |                         |         |                        |                  |         |
| FOXO3A_292 (TT as reference)    | 834 |                     |         |                      |         |                         |         |                        |                  |         |
| TG                              | 661 |                     |         | 0.927 (0.802, 1.07)  | 0.3     | 0.917 (0.793, 1.06)     | 0.241   | 0.922 (0.779, 1.091)   | -0.081(0.086)    | 0.343   |
| GG                              | 139 |                     |         | 0.636 (0.478, 0.845) | 0.002   | 0.629 (0.473, 0.837)    | 0.001   | 0.472 (0.325, 0.685)   | -0.751(0.19)     | <0.001  |
| Residence (Rural as reference)  |     | 0.866 (0.74, 1.013) | 0.073   |                      |         | 0.856 (0.731, 1.002)    | 0.053   | 0.813 (0.658, 1.005)   | -0.207(0.108)    | 0.056   |
| FOXO3A_292 TG * Residence-Urban |     |                     |         |                      |         |                         |         | 0.967 (0.697, 1.342)   | -0.034(0.167)    | 0.84    |
| FOXO3A_292 GG * Residence-Urban |     |                     |         |                      |         |                         |         | 2.386 (1.335, 4.265)   | 0.87(0.296)      | 0.003   |
| <hr/>                           |     |                     |         |                      |         |                         |         |                        |                  |         |
| FOXO3A_310 (GG as reference)    | 845 |                     |         |                      |         |                         |         |                        |                  |         |
| GC                              | 649 |                     |         | 0.907 (0.784, 1.048) | 0.185   | 0.898 (0.776, 1.038)    | 0.145   | 0.903 (0.763, 1.069)   | -0.102(0.086)    | 0.237   |
| CC                              | 140 |                     |         | 0.64 (0.483, 0.849)  | 0.002   | 0.634 (0.478, 0.841)    | 0.002   | 0.482 (0.334, 0.695)   | -0.73(0.187)     | <0.001  |
| Residence (Rural as reference)  |     | 0.866 (0.74, 1.013) | 0.073   |                      |         | 0.855 (0.731, 1.001)    | 0.051   | 0.814 (0.66, 1.004)    | -0.206(0.107)    | 0.055   |
| FOXO3A_310 GC * Residence-Urban |     |                     |         |                      |         |                         |         | 0.964 (0.693, 1.339)   | -0.037(0.168)    | 0.825   |
| FOXO3A_310 CC * Residence-Urban |     |                     |         |                      |         |                         |         | 2.317 (1.302, 4.126)   | 0.84(0.294)      | 0.004   |

Note: All models adjusted for baseline age, education, marriage, smoking, alcohol drinking, and exercise.

**Table S3. The association of *FOXO3A* SNPs, residence and mortality in the male**

| Term                            | n   | Model - Residence    |         | Model - FOXO         |         | Model - FOXO+residence |         | Model - FOXO*residence |                  |         |
|---------------------------------|-----|----------------------|---------|----------------------|---------|------------------------|---------|------------------------|------------------|---------|
|                                 |     | HR (95% CI)          | P value | HR (95% CI)          | P value | HR (95% CI)            | P value | HR (95% CI)            | beta (std.error) | p.value |
| FOXO3A_936 (CC as reference)    | 772 |                      |         |                      |         |                        |         |                        |                  |         |
| TC                              | 570 |                      |         | 1.047 (0.888, 1.234) | 0.586   | 1.049 (0.89, 1.236)    | 0.57    | 1.053 (0.864, 1.284)   | 0.052(0.101)     | 0.608   |
| TT                              | 109 |                      |         | 0.929 (0.685, 1.259) | 0.635   | 0.926 (0.683, 1.254)   | 0.618   | 0.841 (0.582, 1.214)   | -0.174(0.187)    | 0.354   |
| Residence (Rural as reference)  |     | 0.806 (0.671, 0.968) | 0.021   |                      |         | 0.805 (0.67, 0.967)    | 0.02    | 0.788 (0.616, 1.008)   | -0.239(0.126)    | 0.058   |
| FOXO3A_936 TC * Residence-Urban |     |                      |         |                      |         |                        |         | 0.987 (0.69, 1.412)    | -0.013(0.183)    | 0.944   |
| FOXO3A_936 TT * Residence-Urban |     |                      |         |                      |         |                        |         | 1.392 (0.729, 2.656)   | 0.331(0.33)      | 0.316   |
| -----                           |     |                      |         |                      |         |                        |         |                        |                  |         |
| FOXO3A_292 (TT as reference)    | 718 |                      |         |                      |         |                        |         |                        |                  |         |
| TG                              | 587 |                      |         | 0.99 (0.838, 1.17)   | 0.906   | 0.994 (0.841, 1.175)   | 0.946   | 1.014 (0.83, 1.239)    | 0.014(0.102)     | 0.894   |
| GG                              | 146 |                      |         | 1.048 (0.802, 1.368) | 0.732   | 1.043 (0.799, 1.361)   | 0.757   | 0.874 (0.628, 1.215)   | -0.135(0.168)    | 0.422   |
| Residence (Rural as reference)  |     | 0.806 (0.671, 0.968) | 0.021   |                      |         | 0.807 (0.672, 0.969)   | 0.021   | 0.77 (0.597, 0.992)    | -0.262(0.13)     | 0.043   |
| FOXO3A_292 TG * Residence-Urban |     |                      |         |                      |         |                        |         | 0.945 (0.655, 1.363)   | -0.056(0.187)    | 0.762   |
| FOXO3A_292 GG * Residence-Urban |     |                      |         |                      |         |                        |         | 1.794 (1.03, 3.125)    | 0.584(0.283)     | 0.039   |
| -----                           |     |                      |         |                      |         |                        |         |                        |                  |         |
| FOXO3A_310 (GG as reference)    | 724 |                      |         |                      |         |                        |         |                        |                  |         |
| GC                              | 580 |                      |         | 0.986 (0.834, 1.165) | 0.866   | 0.99 (0.837, 1.17)     | 0.904   | 1.006 (0.823, 1.23)    | 0.006(0.102)     | 0.952   |
| CC                              | 147 |                      |         | 1.03 (0.789, 1.344)  | 0.827   | 1.024 (0.785, 1.337)   | 0.859   | 0.853 (0.613, 1.185)   | -0.16(0.168)     | 0.342   |
| Residence (Rural as reference)  |     | 0.806 (0.671, 0.968) | 0.021   |                      |         | 0.807 (0.672, 0.969)   | 0.021   | 0.765 (0.594, 0.985)   | -0.268(0.129)    | 0.038   |
| FOXO3A_310 GC * Residence-Urban |     |                      |         |                      |         |                        |         | 0.953 (0.661, 1.375)   | -0.048(0.187)    | 0.799   |
| FOXO3A_310 CC * Residence-Urban |     |                      |         |                      |         |                        |         | 1.839 (1.057, 3.202)   | 0.609(0.283)     | 0.031   |

Note: All models adjusted for baseline age, education, marriage, smoking, alcohol drinking, and exercise.

**Table S4. The association of *FOXO3A* SNPs, residence and mortality in the population aged younger than 85**

| Term                            | n    | Model - Residence   |         | Model - FOXO         |         | Model - FOXO+residence |         | Model - FOXO*residence |                  |         |
|---------------------------------|------|---------------------|---------|----------------------|---------|------------------------|---------|------------------------|------------------|---------|
|                                 |      | HR (95% CI)         | P value | HR (95% CI)          | P value | HR (95% CI)            | P value | HR (95% CI)            | beta (std.error) | p.value |
| FOXO3A_936 (CC as reference)    | 746  |                     |         |                      |         |                        |         |                        |                  |         |
| TC                              | 489  |                     |         | 0.955 (0.737, 1.238) | 0.729   | 0.946 (0.73, 1.227)    | 0.677   | 0.879 (0.656, 1.179)   | -0.129(0.15)     | 0.39    |
| TT                              | 97   |                     |         | 0.974 (0.596, 1.591) | 0.917   | 0.967 (0.592, 1.579)   | 0.892   | 0.724 (0.39, 1.345)    | -0.323(0.316)    | 0.307   |
| Residence (Rural as reference)  | 1332 | 0.691 (0.51, 0.937) | 0.017   |                      |         | 0.69 (0.509, 0.935)    | 0.017   | 0.562 (0.373, 0.847)   | -0.577(0.21)     | 0.006   |
| FOXO3A_936 TC * Residence-Urban |      |                     |         |                      |         |                        |         | 1.408 (0.749, 2.647)   | 0.342(0.322)     | 0.289   |
| FOXO3A_936 TT * Residence-Urban |      |                     |         |                      |         |                        |         | 2.787 (0.989, 7.858)   | 1.025(0.529)     | 0.053   |
| FOXO3A_292 (TT as reference)    | 694  |                     |         |                      |         |                        |         |                        |                  |         |
| TG                              | 508  |                     |         | 0.904 (0.695, 1.176) | 0.452   | 0.902 (0.693, 1.174)   | 0.443   | 0.886 (0.66, 1.19)     | -0.121(0.151)    | 0.423   |
| GG                              | 130  |                     |         | 1.134 (0.754, 1.705) | 0.546   | 1.121 (0.745, 1.685)   | 0.584   | 0.825 (0.494, 1.376)   | -0.193(0.261)    | 0.46    |
| Residence (Rural as reference)  | 1332 | 0.691 (0.51, 0.937) | 0.017   |                      |         | 0.692 (0.511, 0.939)   | 0.018   | 0.585 (0.383, 0.892)   | -0.537(0.216)    | 0.013   |
| FOXO3A_292 TG * Residence-Urban |      |                     |         |                      |         |                        |         | 1.087 (0.565, 2.092)   | 0.083(0.334)     | 0.804   |
| FOXO3A_292 GG * Residence-Urban |      |                     |         |                      |         |                        |         | 3.009 (1.261, 7.184)   | 1.102(0.444)     | 0.013   |
| FOXO3A_310 (GG as reference)    | 696  |                     |         |                      |         |                        |         |                        |                  |         |
| GC                              | 506  |                     |         | 0.881 (0.676, 1.146) | 0.345   | 0.879 (0.675, 1.144)   | 0.337   | 0.896 (0.667, 1.204)   | -0.109(0.151)    | 0.468   |
| CC                              | 130  |                     |         | 1.12 (0.745, 1.683)  | 0.585   | 1.107 (0.737, 1.663)   | 0.624   | 0.827 (0.496, 1.379)   | -0.19(0.261)     | 0.466   |
| Residence (Rural as reference)  | 1332 | 0.691 (0.51, 0.937) | 0.017   |                      |         | 0.692 (0.511, 0.938)   | 0.018   | 0.628 (0.416, 0.948)   | -0.465(0.21)     | 0.027   |
| FOXO3A_310 GC * Residence-Urban |      |                     |         |                      |         |                        |         | 0.901 (0.463, 1.754)   | -0.104(0.34)     | 0.76    |
| FOXO3A_310 CC * Residence-Urban |      |                     |         |                      |         |                        |         | 2.806 (1.182, 6.663)   | 1.032(0.441)     | 0.019   |

Note: All models adjusted for sex, education, marriage, smoking, alcohol drinking, and exercise.

**Table S5. The association of *FOXO3A* SNPs, residence and mortality in the population aged 85 or older**

| Term                            | n    | Model - Residence    |         | Model - FOXO         |         | Model - FOXO+residence |         | Model - FOXO*residence |                  |         |
|---------------------------------|------|----------------------|---------|----------------------|---------|------------------------|---------|------------------------|------------------|---------|
|                                 |      | HR (95% CI)          | p value | HR (95% CI)          | p value | HR (95% CI)            | P value | HR (95% CI)            | beta (std.error) | p.value |
| FOXO3A_936 (CC as reference)    | 928  |                      |         |                      |         |                        |         |                        |                  |         |
| TC                              | 699  |                      |         | 0.992 (0.88, 1.118)  | 0.892   | 0.989 (0.877, 1.115)   | 0.859   | 1.004 (0.87, 1.158)    | 0.004(0.073)     | 0.959   |
| TT                              | 126  |                      |         | 0.874 (0.692, 1.103) | 0.256   | 0.873 (0.691, 1.102)   | 0.253   | 0.768 (0.571, 1.033)   | -0.263(0.151)    | 0.081   |
| Residence (Rural as reference)  | 1753 | 0.935 (0.822, 1.064) | 0.308   |                      |         | 0.935 (0.822, 1.064)   | 0.307   | 0.928 (0.782, 1.1)     | -0.075(0.087)    | 0.389   |
| FOXO3A_936 TC * Residence-Urban |      |                      |         |                      |         |                        |         | 0.949 (0.729, 1.235)   | -0.052(0.134)    | 0.696   |
| FOXO3A_936 TT * Residence-Urban |      |                      |         |                      |         |                        |         | 1.447 (0.894, 2.342)   | 0.37(0.246)      | 0.132   |
| -----                           |      |                      |         |                      |         |                        |         |                        |                  |         |
| FOXO3A_292 (TT as reference)    | 858  |                      |         |                      |         |                        |         |                        |                  |         |
| TG                              | 740  |                      |         | 1.005 (0.891, 1.132) | 0.941   | 1.003 (0.889, 1.13)    | 0.966   | 1.025 (0.889, 1.183)   | 0.025(0.073)     | 0.732   |
| GG                              | 155  |                      |         | 0.807 (0.649, 1.004) | 0.055   | 0.806 (0.648, 1.002)   | 0.053   | 0.677 (0.513, 0.895)   | -0.39(0.142)     | 0.006   |
| Residence (Rural as reference)  | 1753 | 0.935 (0.822, 1.064) | 0.308   |                      |         | 0.934 (0.821, 1.062)   | 0.299   | 0.921 (0.771, 1.099)   | -0.083(0.091)    | 0.361   |
| FOXO3A_292 TG * Residence-Urban |      |                      |         |                      |         |                        |         | 0.925 (0.711, 1.202)   | -0.078(0.134)    | 0.559   |
| FOXO3A_292 GG * Residence-Urban |      |                      |         |                      |         |                        |         | 1.679 (1.07, 2.637)    | 0.518(0.23)      | 0.024   |
| -----                           |      |                      |         |                      |         |                        |         |                        |                  |         |
| FOXO3A_310 (GG as reference)    | 873  |                      |         |                      |         |                        |         |                        |                  |         |
| GC                              | 723  |                      |         | 0.998 (0.885, 1.125) | 0.973   | 0.996 (0.883, 1.123)   | 0.949   | 1.011 (0.876, 1.166)   | 0.011(0.073)     | 0.885   |
| CC                              | 157  |                      |         | 0.804 (0.647, 0.999) | 0.049   | 0.802 (0.646, 0.997)   | 0.047   | 0.673 (0.511, 0.887)   | -0.395(0.141)    | 0.005   |
| Residence (Rural as reference)  | 1753 | 0.935 (0.822, 1.064) | 0.308   |                      |         | 0.933 (0.821, 1.062)   | 0.295   | 0.909 (0.762, 1.084)   | -0.095(0.09)     | 0.289   |
| FOXO3A_310 GC * Residence-Urban |      |                      |         |                      |         |                        |         | 0.95 (0.73, 1.235)     | -0.052(0.134)    | 0.7     |
| FOXO3A_310 CC * Residence-Urban |      |                      |         |                      |         |                        |         | 1.698 (1.084, 2.662)   | 0.53(0.229)      | 0.021   |

Note: All models adjusted for sex, education, marriage, smoking, alcohol drinking, and exercise.
